# Supplementary material for: Synthesis and evaluation of CoPc grafted bismuth oxyhalide (Bi24O31Br10): a visible light-active photocatalyst for CO2 reduction into methanol
Source: Royal Society of Chemistry journal article supplement (doi:10.1039/c9dt00792j), 2019-01-01
Supplement: c9dt00792j1.pdf [file c9dt00792j1.pdf]

## **Supplementary Information**

### **Synthesis and Evaluation of CoPc Grafted Bismuth Oxyhalide (Bi<sub>24</sub>O<sub>31</sub>Br<sub>10</sub>): A Visible Light-Active Photocatalyst for CO<sub>2</sub> Reduction into Methanol**

Pankaj Kumar Prajapati<sup>1,2</sup> and Suman L. Jain<sup>1\*</sup>

<sup>1</sup>Chemical and Material Sciences Division, CSIR-Indian Institute of Petroleum, Haridwar Road, Mohkampur, Dehradun-248005, India;

<sup>2</sup>Academy of Scientific and Innovative Research, New Delhi-110001, India

\*Corresponding author

Email: [suman@iip.res.in](mailto:suman@iip.res.in); Phone: +911352525788

#### **Table of Content**

|                                                                                                                                     |      |
|-------------------------------------------------------------------------------------------------------------------------------------|------|
| 1.1. HR-TEM images and the elemental composition of B <sub>24</sub> O <sub>31</sub> Br <sub>10</sub> semiconductor (Figure S1)..... | (S2) |
| 1.2. Elemental mapping of B <sub>24</sub> O <sub>31</sub> Br <sub>10</sub> semiconductor (Figure S2). ....                          | (S3) |
| 1.3. Thermal degradation pattern of CoPc/BOB (Figure S3) .....                                                                      | (S4) |
| 1.4. Re-purging experiment of CoPc/BOB (Figure S4) .....                                                                            | (S5) |
| 1.5. Calibration curve for methanol (Figure S5).....                                                                                | (S6) |
| 1.6. GC-FID chromatogram for yield of methanol (Figure S6) .....                                                                    | (S7) |
| References.....                                                                                                                     | (S8) |

## 1.1. HR-TEM images and elemental composition

The HR-TEM images of the semiconductor showed hexagonal and spherical shape of the particles at 20 nm (Figure S1). The inter-planar distance ( $d$ ) values at 0.284 and 0.309 nm corresponding to (117) and (213), respectively.<sup>1</sup> SAED confirmed the crystallinity of the semiconductor due to the presence of bright spots (Figure S1e). The elemental composition of bismuth, bromine, and oxygen represented in the EDX pattern of BOB confirmed the presence of Bi, Br, and O (Figure S1f). The elemental mapping indicated the significantly higher concentration of Bi as compared to the O in the semiconductor BOB (Figure S2).

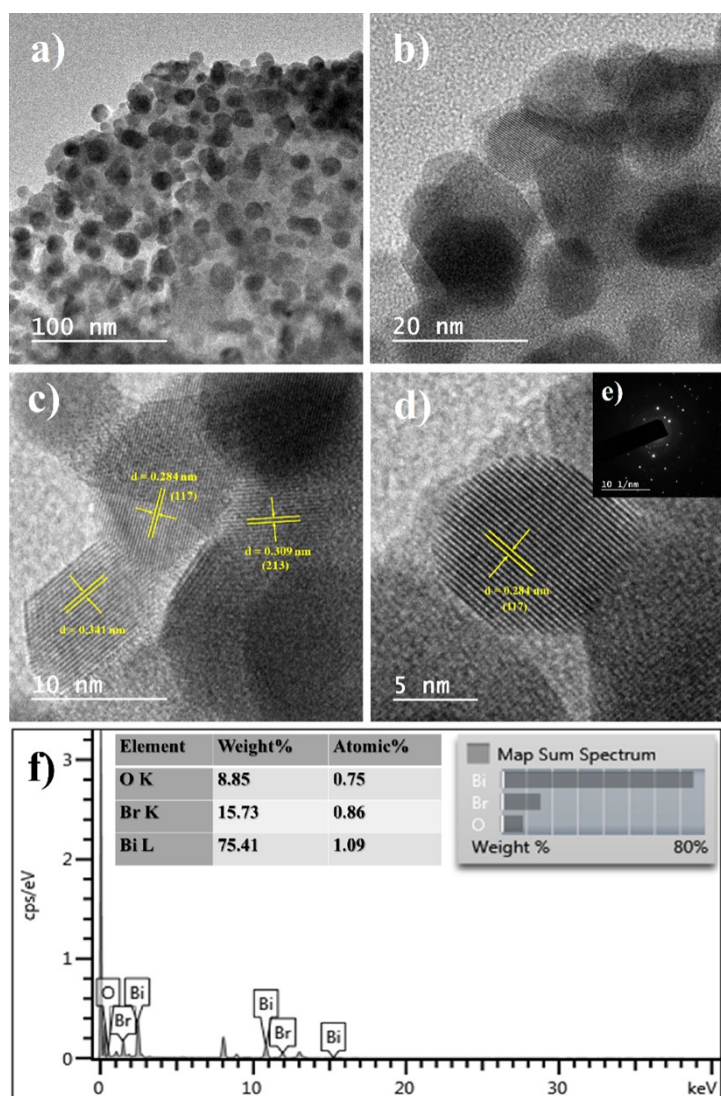

**Figure S1.** HR-TEM images and EDX pattern of BOB semiconductor 1

## 1.2. Elemental mapping of $B_{24}O_{31}Br_{10}$ semiconductor

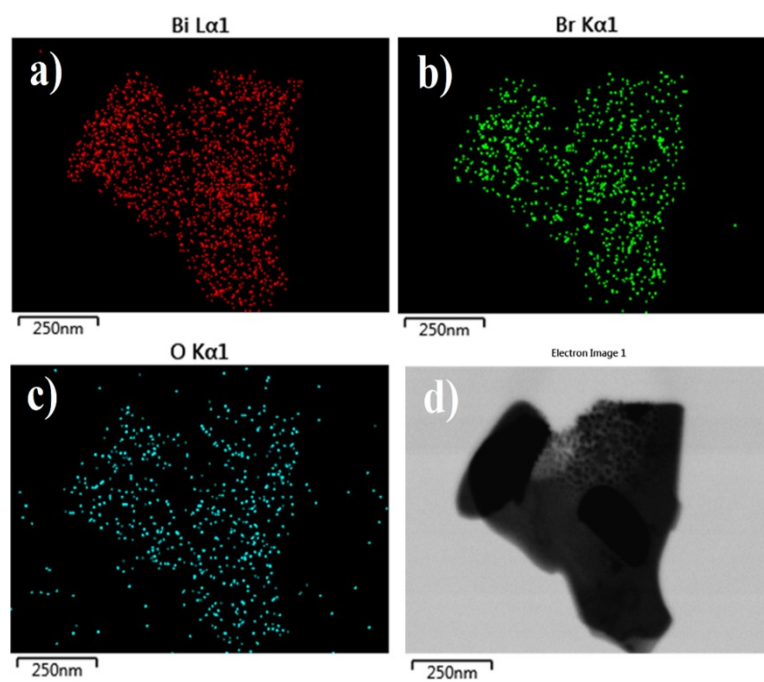

**Figure S2.** Elemental mapping of a) Bi, b) Br, c) O and d) electron image in BOB semiconductor.

### 1.3. Thermal degradation pattern

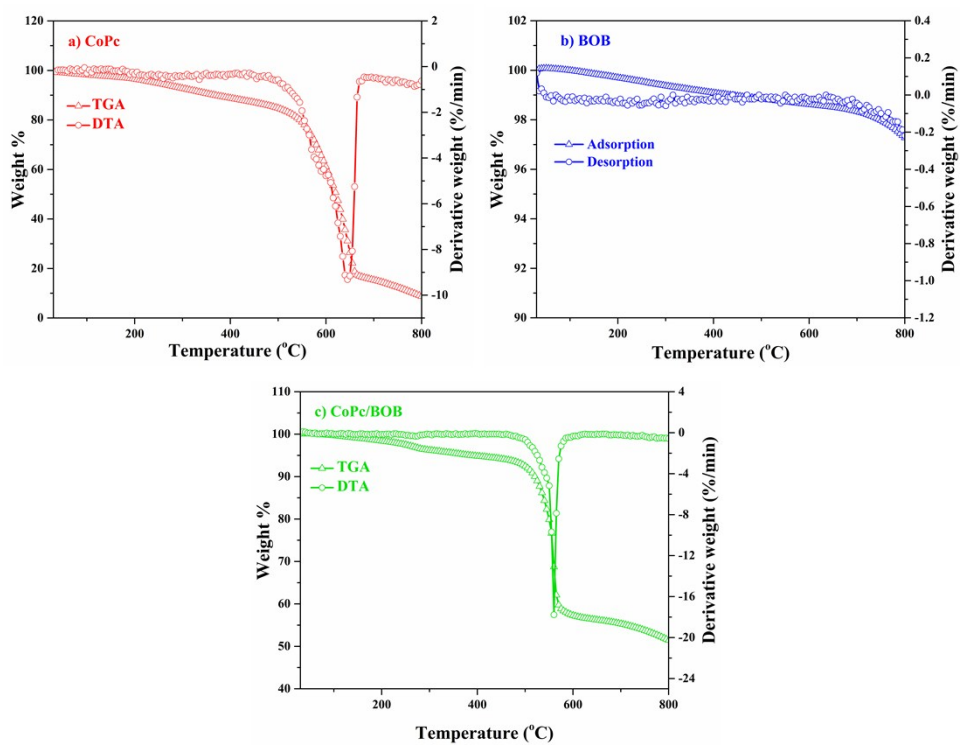

**Figure S3.** TG-DTA of a) CoPc, b) BOB and c) CoPc/BOB hybrid

#### 1.4. Re-purging experiment for evaluation of photocatalyst stability

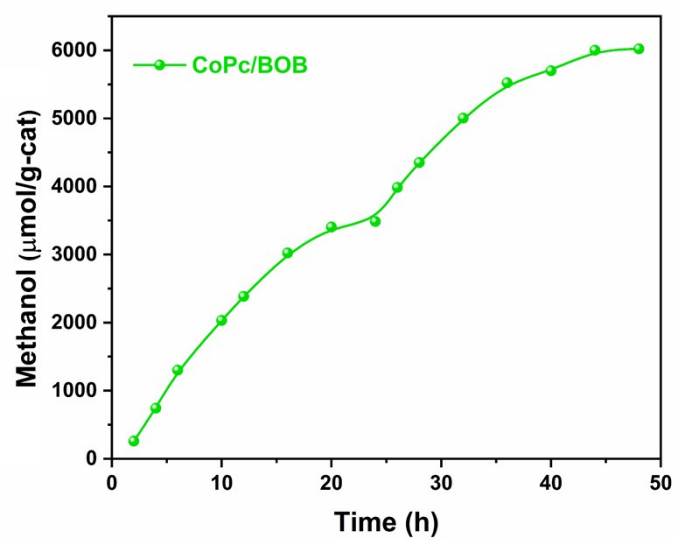

Figure S4. Repurging experiment

### 1.5. Calibration curve for methanol

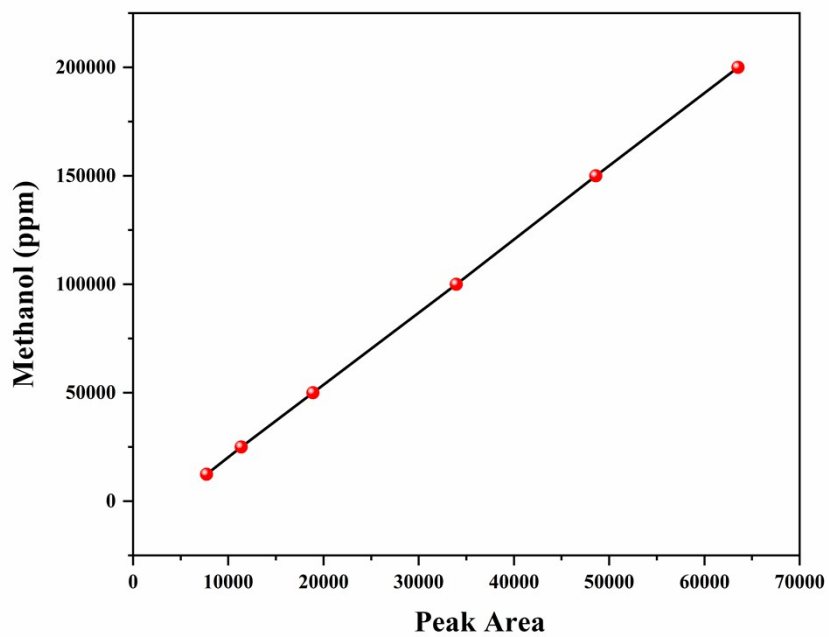

**Figure S5.** Calibration curve for methanol quantified by GC-FID

## 1.6. GC-FID chromatogram

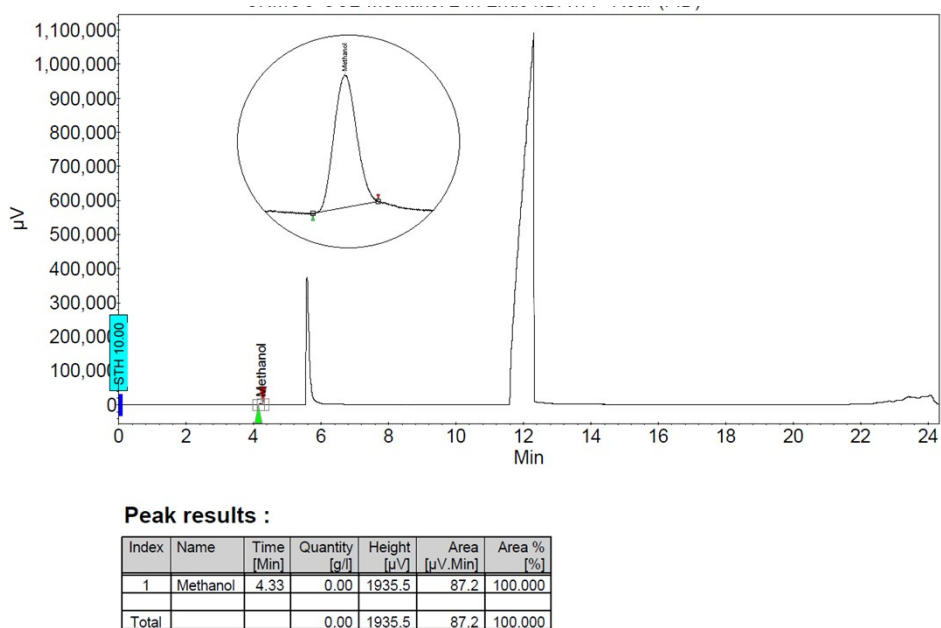

**Figure S6.** GC-FID chromatogram of the reaction mixture after 24 h of irradiation using CoPc/BOB photocatalyst

## References

1. Z. Liu, J. Niu, P. Feng, Y. Sui and Y. Zhu, *RSC Adv.*, 2014, **4**, 43399-43405.
